# Supplementary material for: Glacier loss and vegetation expansion alter organic and inorganic carbon dynamics in alpine streams
Source: Copernicus journal article supplement (doi:10.5194/bg-2023-12), 2023-02-01
Supplement: Supplementary file 1 [file bg-2023-12-supplement.pdf]

## Supplementary information

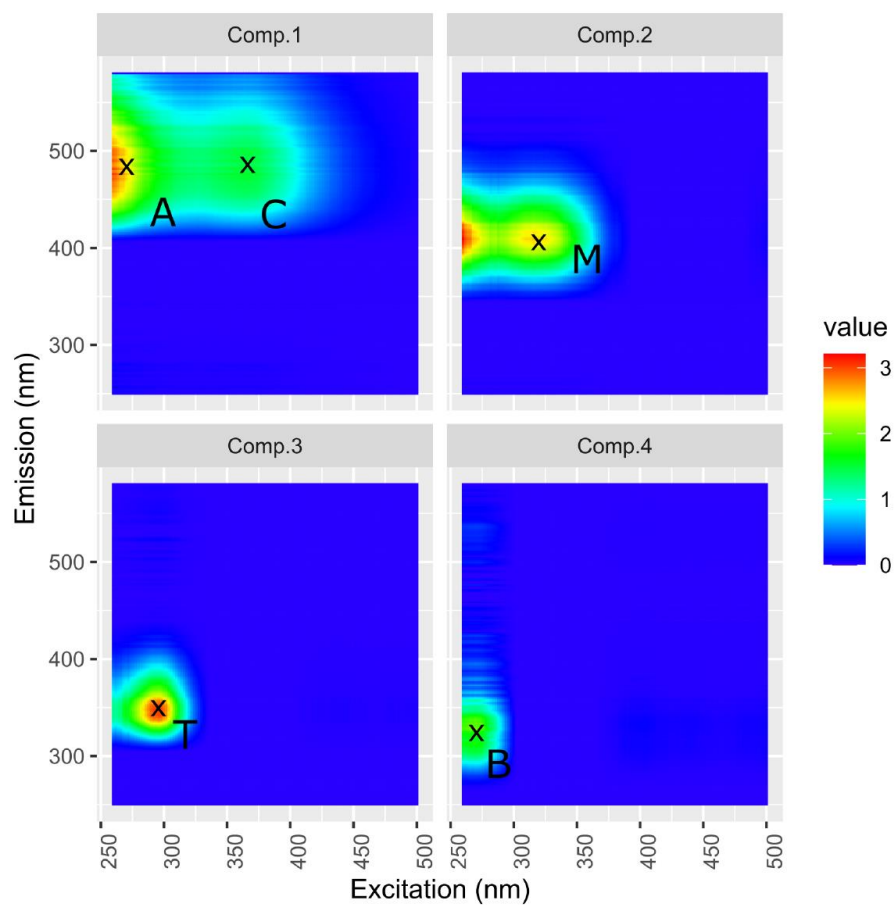

Figure S1: Contour plots that describe emission intensities as a function of excitation wavelengths for the four components of the PARAFAC model. The approximate location of the five Coble peaks are overlaid (Coble et al., 1998, 1990).

Table S1: Partial least squares (PLS) model VIP scores and coefficients for variables identified as highly ( $VIP \geq 1.0$ ) or moderately ( $0.8 \leq VIP < 1.0$ ) influential in predicting median CO<sub>2</sub> saturation at a site.

| <b>Variable</b>            | <b>VIP score</b> | <b>Coefficient</b> |
|----------------------------|------------------|--------------------|
| Specific conductivity      | 3.03             | -0.43              |
| Sulfate                    | 1.86             | 0.10               |
| Calcium                    | 2.04             | 0.68               |
| DOC                        | 0.77             | -0.09              |
| Total suspended solids     | 1.66             | -0.82              |
| Elevation                  | 2.67             | 0.48               |
| Watershed area             | 1.73             | -0.53              |
| Runoff                     | 1.45             | 0.74               |
| Watershed glacier cover    | 1.95             | -0.31              |
| Watershed vegetation cover | 1.31             | -0.45              |
